# Supplementary material for: Cyanate ester resins with superior dielectric, mechanical, and flame retardance properties obtained by introducing a fluorinated hyperbranched polyaryletherketone
Source: Royal Society of Chemistry journal article supplement (doi:10.1039/d2py00211f), 2022-01-01
Supplement: d2py00211f3.pdf [file d2py00211f3.pdf]

## Electronic Supplementary Information

Cyanate ester resins with superior dielectric, mechanical, and flame retardant properties by introducing fluorinated hyperbranched polyaryletherketone

Junliang Zhang<sup>a</sup>, Chaofan Wang<sup>a</sup>, Wenzhuo Feng<sup>b</sup>, Yusheng Tang<sup>a\*</sup>

<sup>a</sup>Shaanxi Key Laboratory of Macromolecular Science and Technology, School of Chemistry and Chemical Engineering, Northwestern Polytechnical University, Xi'an, Shaanxi, 710072, P. R. China.

<sup>b</sup>Queen Mary University of London Engineering School, Northwestern Polytechnical University, Xi'an, Shaanxi, 710072, P. R. China.

\*Corresponding author, Email: [tys@nwpu.edu.cn](mailto:tys@nwpu.edu.cn) (Y. Tang)

## Materials

Bisphenol A dicyanate ester (BADCy, density 1.171 g/cm<sup>3</sup>, molar mass 278.31 g/mol) resin was received from Jiangsu Wuqiao Resin Factory Co., Ltd. (Jiangsu, China). Bisphenol AF (BPAF, 98%), N-Methylpyrrolidone (NMP, ≥99.0%), and benzyl triethyl ammonium chloride (TEBAC, >98.0%) were purchased from Aladdin Reagent Co., Ltd. (Shanghai, China). Difluorobenzophenone (DFBP, 99%), phloroglucinol (PG, ≥99.0%) and epichlorohydrin (ECH, >99.0%) were all purchased from Macklin Reagent Co., Ltd. (Shanghai, China). Anhydrous potassium carbonate (K<sub>2</sub>CO<sub>3</sub>, >99.0%) and sodium hydroxide (NaOH, >99.0%) were both bought from Komeo Chemical Reagent Co., Ltd. (Tianjin, China). All the chemicals were used as received without further treatment.

## Methods

**<sup>1</sup>H nuclear magnetic resonance (NMR):** <sup>1</sup>H NMR spectra of the samples was measured by Bruker Avance 400 MHz NMR instrument (Bruker, Germany) with tetramethylsilane (TMS) containing CDCl<sub>3</sub> as a solvent.

**Fourier transform infrared spectroscopy (FT-IR):** FT-IR spectra of the samples were measured on Bruker Tensor 27 infrared spectrometer (Bruker, Germany) applying potassium bromide (KBr) tablet compression method with the test wave number range of 4000~400 cm<sup>-1</sup>.

**Size exclusion chromatography (SEC):** The number average molar mass ( $M_n$ ), weight average molar mass ( $M_w$ ), and molar mass distribution (PDI) of the samples were determined using waters1515 (Waters Technology Co., China.) gel permeation chromatography using tetrahydrofuran (THF) as an eluent at a flow rate of 1.0 mL min<sup>-1</sup> (35°C). The column system was calibrated with polystyrene standards (molar mass

ranging from 1100 to 138600 g mol<sup>-1</sup>). Samples were diluted to a concentration about 10 mg mL<sup>-1</sup> and filtered through 0.45 µm Nylon syringe filters before injection.

**Differential scanning calorimetry (DSC):** The curing process of *m*-BADCy resin was measured by DSC1 of Mettler-Toledo (Mettler, Switzerland) at heating rates of 5°C/min, 10°C/min, 15°C/min, and 20°C/min under nitrogen atmosphere. The weight of each sample used was 5~10 mg.

**Thermal gravimetric analysis (TGA):** TGA was performed by STA 449F3 (NETZSCH Co., Germany) thermal gravimetric analyzer. The test temperature range was 40~800°C, and the heating rate was 10°C/min under argon atmosphere. The mass was about 5 mg for each sample.

**Scanning electron microscopy (SEM):** Scanning electron microscopy was performed on a VEGA3-LMH equipment (TESCAN Co., Czech Republic) to analyze the fracture morphology of the resin. The scanning voltage was 20 kV and the sample was sprayed with gold before testing.

**Limit oxygen index (LOI):** The flame retardant properties of sample was tested by ZR-01 type oxygen index tester (Qingdao shanfang Instrument Co., China) according to ASTM D2863/77 standard. The size of the sample was 80 mm×10 mm×4 mm.

**Vertical combustion test (UL-94):** The flame retardant properties of sample was tested by ZR-02 horizontal and vertical combustion tester (Qingdao shanfang Instrument Co., China) according to ASTM D635-77 standard. The size of the sample was 125 mm×13 mm× 3 mm.

**Conical calorimeter:** The flame retardant properties of sample was tested by the conical calorimeter 6810 (VOUCH Co., China) according to ISO 5660-1: 2005 standard. The heat flux was 50 KW/m<sup>2</sup>, and the sample size was 100 mm× 100 mm× 3 mm.

**Dielectric properties:** Dielectric constant ( $\epsilon$ ) and dielectric loss tangent ( $\tan\delta$ ) values of the samples were measured using a Novocontrol Technologies Alpha-N high resolution dielectric analyzer (Novocontrol, Germany) at room temperature. The corresponding dimension of the specimens was 15 mm×15 mm×1 mm. A layer of conductive silver paste was coated on the surface of the sample before testing, and then the sample was dried at 40°C for two hours. The  $\epsilon$  values in the X-band frequency range (8.2~12.4 GHz) of the samples were measured using a MS4644A vector network analyzer (Anritsu Corp., Japan) according to ASTM D5568-08 at room temperature. The corresponding dimension of the specimens was 22.86 mm×10.14 mm×3 mm.

**Mechanical properties:** The flexural strength of the samples was tested by SANS2CMT5105 electronic universal testing machine (Shenzhen New Sansi Co., China) according to ISO 178-2010 standard. The impact strength of the samples was tested by X CJ-40 impact testing machine (Chengde Materials Testing Co., China) according to ISO 179-2010 standard. The sample sizes for flexural and impact strength tests were 80 mm×15 mm×4 mm and 80 mm×10 mm×4, respectively.

$$\ln \frac{\beta}{T_p^2} = \ln \frac{AR}{E} - \frac{E}{RT_p} \quad (\text{Equation S1})$$

$$\lg \beta = \lg \frac{AE}{RG(a)} - 2.315 - 0.4567 \frac{E}{RT_p} \quad (\text{Equation S2})$$

$$\frac{d(\ln \beta)}{d(1/T_p)} \approx \frac{-E}{nR} \quad (\text{Equation S3})$$

Where,  $\beta$  is the heating rate, K·min<sup>-1</sup>;  $T_p$  is peak temperature, K; A is the frequency factor, min<sup>-1</sup>; R is the ideal gas constant, 8.314 J·mol<sup>-1</sup>·K<sup>-1</sup>; E is the apparent activation energy, kJ·mol<sup>-1</sup>; G(a) is a function related to the conversion rate, n is the order of reaction.

$$A = \frac{2\pi d \epsilon \tan \delta}{\lambda (\delta - \sin^2 \theta)^{1/2}} \quad (\text{Equation S4})$$

$$|\Gamma|^2 = \left[ \frac{(\epsilon - \sin^2 \theta)^{\frac{1}{2}} - \epsilon \cos \theta}{(\epsilon - \sin^2 \theta)^{\frac{1}{2}} + \epsilon \cos \theta} \right]^2 \quad (\text{Equation S5})$$

$$A + |T|^2 + |\Gamma|^2 = 1 \quad (\text{Equation S6})$$

Where,  $A$  represents energy loss;  $d$  is the thickness of the wave-permeable material;  $\lambda$  is the wavelength of electromagnetic waves;  $\theta$  represents the incidence angle of electromagnetic wave through the material surface.

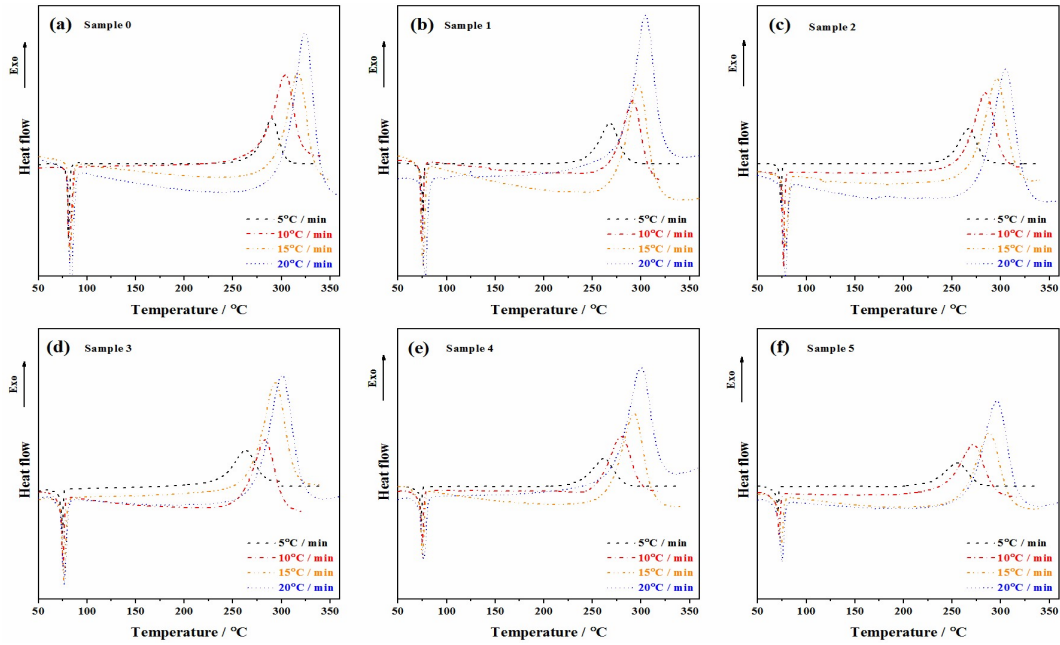

**Figure S1.** DSC curves of unmodified BADCy and *m*-BADCy resins at different heating rate

**Table S1** Peak temperatures of DSC curves of the curing reaction for unmodified BADCy and *m*-BADCy resins at different heating rate

| Samples  | Peak temperature/°C |          |          |          |
|----------|---------------------|----------|----------|----------|
|          | 5°C/min             | 10°C/min | 15°C/min | 20°C/min |
| Sample 0 | 289.8               | 303.5    | 316.9    | 323.8    |

|          |       |       |       |       |
|----------|-------|-------|-------|-------|
| Sample 1 | 268.1 | 291.4 | 297.2 | 304.9 |
| Sample 2 | 267.2 | 284.8 | 295.9 | 303.8 |
| Sample 3 | 263.3 | 283.8 | 294.5 | 300.6 |
| Sample 4 | 262.0 | 281.0 | 293.6 | 299.2 |
| Sample 5 | 255.7 | 272.1 | 289.0 | 297.5 |

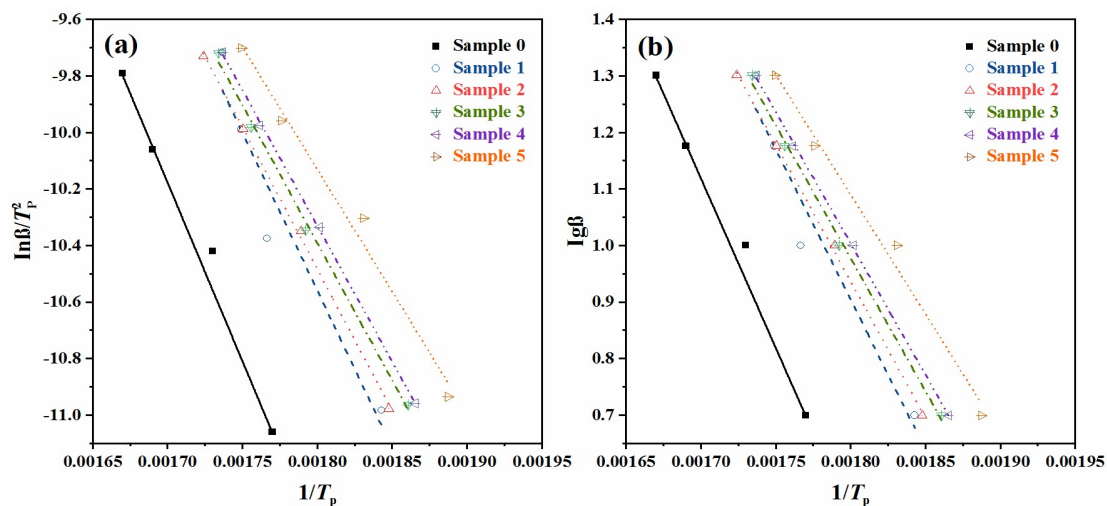

**Figure S2.** Kinetic curves of the curing reaction for unmodified BADCy and *m*-BADCy resin calculated by Kissinger (a) and Ozawa (b) method

**Table S2** Apparent activation energy and reaction order of unmodified BADCy and *m*-BADCy resins

| Samples  | Apparent activation energy/kJ·mol <sup>-1</sup> |       | Reaction order |
|----------|-------------------------------------------------|-------|----------------|
|          | Kissinger                                       | Ozawa | n              |
| Sample 0 | 105.1                                           | 109.3 | 0.91           |
| Sample 1 | 92.7                                            | 97.2  | 0.91           |
| Sample 2 | 87.2                                            | 88.3  | 0.90           |
| Sample 3 | 80.9                                            | 85.7  | 0.90           |
| Sample 4 | 79.9                                            | 84.8  | 0.90           |
| Sample 5 | 72.0                                            | 77.1  | 0.89           |

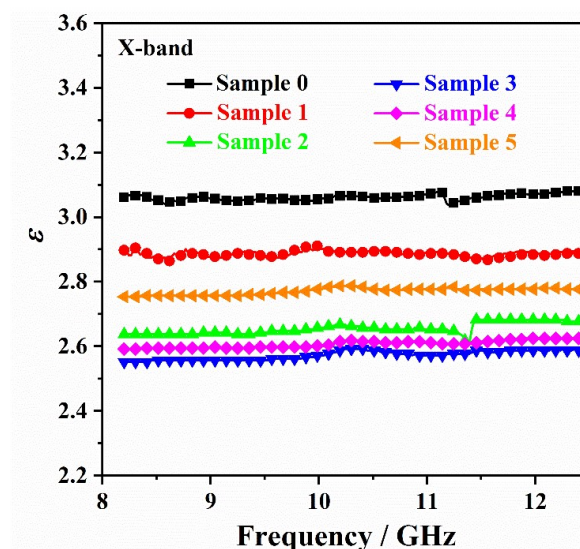

**Figure S3.** The dielectric constant ( $\epsilon$ ) of unmodified BADCy (Sample 0) and *m*-BADCy (Sample 1-5) resins in X-band frequency range (8.2~12.4 GHz).

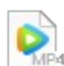

Unmodified BADCy.mp4

### Multimedia component S1

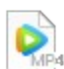

*m*-BADCy with 20 wt% HBPAEK.mp4

### Multimedia component S2

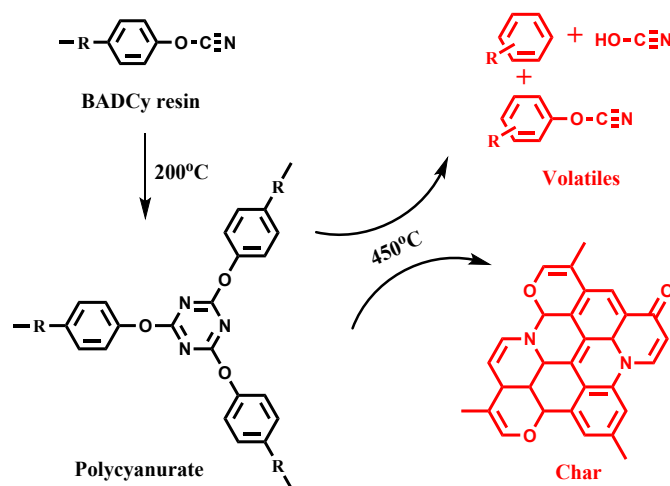

**Scheme S1.** Schematic diagram of polymerization and thermal degradation of BADCy resin
